# Supplementary material for: PSENEN influences the progression of renal clear cell carcinoma by regulating the immune microenvironment and oxidative phosphorylation
Source: PeerJ. 2024 Nov 29;12:e18457. doi: 10.7717/peerj.18457 (PMC11610461; doi:10.7717/peerj.18457)
Supplement: Supplemental Information 1 [file peerj-12-18457-s001.xlsx]

## Sheet: Sheet1
Immunohistochemistry: Expression of PSENEN in KIRC and adjacent tissues
Pathological Types	PSENEN Expression Level			Total	P-value
	+	++	+++
Cancer Tissue	8（34.8%）	10（43.5%）	5（21.7%）	23
Adjacent Tissue	13（56.5%）	10（43.5%）	0	23
					P＜0.05

## Sheet: Sheet2
Immunohistochemistry: Expression Level of PSENEN in Different Grades of KIRC
Clinical and Pathological Indicators	Number of Cases	PSENEN Expression Level			X2	P-value
		+	++	+++
Tissue Nature					6.19	＜0.05
KIRC Tissue	23	8	10	5
Adjacent Tissue	23	13	10	0
Gender					0.212	1
Male	13	4	6	3
Female	10	4	4	2
Age					5.197	0.072
＜60	10	5	5	0
≥60	13	3	5	5
ISUP Grade					22.54	＜0.01
Grade 1	6	5	1	0
Grade 2	10	3	7	0
Grade 3	5	0	2	3
Grade 4	2	0	0	2
Tumor Side					2.261	0.376
Left	12	3	7	2
Right	11	5	3	3

## Sheet: Sheet3
qPCR: Expression of PSENEN in KIRC and Adjacent Tissues
RNA Extraction: Tissue Dosage and RNA Concentration and OD Value
Tissue	Amount（mg）	Concentration（ng/ul）	A260/A230	A260/A280
Tumor Tissue 1	36	1020.8	2.055	2.009
Adjacent Tissue 1	28	836	2.182	2.021
Tumor Tissue 2	24	605.6	2.151	1.987
Adjacent Tissue 2	42	712	2.318	1.956
Tumor Tissue 3	35	376.8	2.066	1.922
Adjacent Tissue 3	30	468	2.151	1.931
Tumor Tissue 4	41	1493.6	1.949	1.984
Adjacent Tissue 4	34	361.6	2	1.86
Tumor Tissue 5	24	1278.4	2.293	1.998
Adjacent Tissue 5	30	1244.8	2.292	1.97

## Sheet: Sheet4
qPCR: Expression of PSENEN in KIRC and Adjacent Tissues
Calculation of Target Gene Expression Level
Reference Gene					Target Gene
Sample Name	Reference Gene	CT Value	Average Value		Sample Name	Target Gene	CT Value	▲CT = Target Gene CT - Reference Gene CT Average		▲▲CT = Target Gene ▲CT - Control Group ▲CT Average	2^(-▲▲CT)
A1	GAPDH	18.8061			A1	PSENEN	24.9451	6.2113		-1.26541	2.40395
A1	GAPDH	18.4129			A1	PSENEN	24.6251	5.89137		-1.58533	3.00077
A1	GAPDH	18.9823	18.7338		A1	PSENEN	24.7959	6.06214		-1.41457	2.6658	2.69017
Z1	GAPDH	17.0015			Z1	PSENEN	24.5346	7.53227	7.47671	0.0555649	0.962218
Z1	GAPDH	17.0016			Z1	PSENEN	24.4655	7.46311		-0.0135937	1.00947
Z1	GAPDH	17.0041	17.0024		Z1	PSENEN	24.4371	7.43473		-0.0419712	1.02952	1.0004
A2	GAPDH	17.5614			A2	PSENEN	24.9495	7.41396		-0.92967	1.90484
A2	GAPDH	17.4713			A2	PSENEN	24.9749	7.43943		-0.904196	1.8715
A2	GAPDH	17.5355	17.5355		A2	PSENEN	24.9224	7.38688		-0.956745	1.94093	1.90576
Z2	GAPDH	15.5073			Z2	PSENEN	23.4132	7.77214		-0.571485	1.48605
Z2	GAPDH	15.9153			Z2	PSENEN	24.0612	8.42017		0.0765425	0.948328
Z2	GAPDH	15.5005	15.6411		Z2	PSENEN	24.4796	8.83857	8.34363	0.494942	0.70959	1.04799
A3	GAPDH	17.2725			A3	PSENEN	25.2046	7.77786		-1.75742	3.38093
A3	GAPDH	17.3528			A3	PSENEN	25.4659	8.03909		-1.49619	2.82097
A3	GAPDH	17.4268	17.4268		A3	PSENEN	25.3735	7.94678		-1.58851	3.00738	3.06976
Z3	GAPDH	15.3664			Z3	PSENEN	24.8988	9.49		-0.0452811	1.03188
Z3	GAPDH	15.4353			Z3	PSENEN	25.0421	9.63322		0.0979379	0.934368
Z3	GAPDH	15.4248	15.4088		Z3	PSENEN	24.8915	9.48263	9.53528	-0.0526568	1.03717	1.00114
A4	GAPDH	17.0265			A4	PSENEN	25.8715	8.78459		-1.24438	2.36917
A4	GAPDH	17.1436			A4	PSENEN	25.8131	8.72611		-1.30286	2.46718
A4	GAPDH	17.0869	17.0869		A4	PSENEN	25.846	8.75901		-1.26996	2.41155	2.41597
Z4	GAPDH	15.9838			Z4	PSENEN	26.1208	10.0918		0.0628109	0.957397
Z4	GAPDH	16.0428			Z4	PSENEN	25.9608	9.93174		-0.0972404	1.06973
Z4	GAPDH	16.0606	16.029		Z4	PSENEN	26.0925	10.0634	10.029	0.0344296	0.976418	1.00118
A5	GAPDH	17.3779			A5	PSENEN	25.1546	7.76914		-0.422242	1.34001
A5	GAPDH	17.4497			A5	PSENEN	24.4309	7.04543		-1.14595	2.21291
A5	GAPDH	17.3854	17.3854		A5	PSENEN	24.3169	6.93147		-1.25991	2.3948	1.98258
Z5	GAPDH	16.7071			Z5	PSENEN	24.8592	8.27382		0.0824413	0.944458
Z5	GAPDH	16.544			Z5	PSENEN	24.7528	8.16742		-0.0239582	1.01675
Z5	GAPDH	16.505	16.5854		Z5	PSENEN	24.7183	8.1329	8.19138	-0.0584831	1.04137	1.00086

## Sheet: Sheet5
Average OD Value at 450 nm for Each Group of A498 Cells
Time	0 mM	1 mM	5 mM	10 mM	15 mM
	Control	Treat	Treat	Treat	Treat
0 h	0.054	0.054	0.054	0.054	0.054
24 h	0.099	0.084	0.068	0.064	0.062
48 h	0.237	0.2	0.175	0.079	0.065
72 h	0.428	0.421	0.37	0.122	0.062

## Sheet: Sheet6
Average Migration Rate of A498 Cells in Each Group at Different Times
Time	0 mM	1 mM	5 mM	10 mM	15 mM
	Control	Treat	Treat	Treat	Treat
12 h	0.4633	0.4368	0.3312	0.2603	0.2204
24 h	0.7125	0.6847	0.4797	0.4001	0.3546

## Sheet: Sheet7
Invasion Number of A498 Cells in Each Group
Group	0 mM	1 mM	5 mM	10 mM	15 mM
	Control	Treat	Treat	Treat	Treat
Cell Invasion Number	179	124	116	75	63
	185	132	123	79	53
	167	118	106	89	80
	196	148	131	73	64
Average Number	182	131	119	79	65

## Sheet: Sheet8
qPCR: Expression Level of PSENEN in Metformin-Treated A498 Cells
RNA Concentration and OD Value
RNA Sample	Concentration（ng/ul）	A260/A230	A260/A280
0 mM Control	632.483	2.031	2.016
1 mM Treat	417.551	2.032	1.987
5 mM Treat	397.271	2.013	1.923
10 mM Treat	466.16	2.183	1.94
15 mM Treat	366.042	2.037	1.889

## Sheet: Sheet9
qPCR: Expression Level of PSENEN in Metformin-Treated A498 Cells
qPCR Experimental Results for PSENEN
Reference Gene	CT Value	Target Gene	CT Value	∆CT	2^（-∆∆CT）
					Average Value
GAPDH	15.83	PSENEN	24.735	8.994	0.945
GAPDH	15.745	PSENEN	24.68	8.939	0.981
GAPDH	15.646	PSENEN	24.544	8.803	1.078
GAPDH	15.639	PSENEN	25.019	9.355	0.736
GAPDH	15.841	PSENEN	25.316	9.652	0.599
GAPDH	15.512	PSENEN	25.133	9.469	0.68
GAPDH	15.394	PSENEN	25.911	10.416	0.353
GAPDH	15.574	PSENEN	25.121	9.626	0.61
GAPDH	15.518	PSENEN	25.164	9.669	0.592
GAPDH	15.436	PSENEN	25.964	10.482	0.337
GAPDH	15.467	PSENEN	25.321	9.839	0.526
GAPDH	15.543	PSENEN	25.962	10.48	0.337
GAPDH	15.249	PSENEN	26.566	11.107	0.218
GAPDH	15.495	PSENEN	25.992	10.533	0.325
GAPDH	15.633	PSENEN	26.049	10.59	0.313

## Sheet: Sheet10
qPCR: Expression Level of AMPK in Metformin-Treated A498 Cells
qPCR Experimental Results for AMPK
Reference Gene	CT Value	Target Gene	CT Value	∆CT	2^（-∆∆CT）
					Average Value
GAPDH	15.83	AMPK	23.487	7.746	0.994
GAPDH	15.745	AMPK	23.183	7.442	1.228
GAPDH	15.646	AMPK	23.767	8.026	0.819
GAPDH	15.639	AMPK	22.848	7.184	1.469
GAPDH	15.841	AMPK	22.37	6.707	2.044
GAPDH	15.512	AMPK	22.83	7.167	1.486
GAPDH	15.394	AMPK	21.956	6.46	2.425
GAPDH	15.574	AMPK	21.828	6.333	2.648
GAPDH	15.518	AMPK	21.887	6.392	2.543
GAPDH	15.436	AMPK	21.031	5.549	4.561
GAPDH	15.467	AMPK	21.484	6.002	3.332
GAPDH	15.543	AMPK	21.585	6.103	3.106
GAPDH	15.249	AMPK	20.953	5.494	4.738
GAPDH	15.495	AMPK	20.731	5.272	5.527
GAPDH	15.633	AMPK	20.531	5.072	6.349

[truncated: 1 more sheets: Sheet11]
